1 **Structural basis of STAT2 recognition by IRF9 reveals molecular insights into**  
2 **ISGF3 function**

3 Srinivasan Rengachari<sup>1</sup>, Silvia Groiss<sup>1</sup>, Juliette, Devos<sup>1</sup>, Elise Caron<sup>2</sup>, Nathalie Grandvaux<sup>2,3</sup>,  
4 Daniel Panne<sup>1\*</sup>

5 <sup>1</sup>European Molecular Biology Laboratory, 38042 Grenoble, France

6 <sup>2</sup>CRCHUM - Research center, Centre Hospitalier de l'Université de Montréal, Montréal,  
7 H2X0A9, Québec, Canada

8 <sup>3</sup>Department of Biochemistry and Molecular Medicine, Université de Montréal; Faculty of  
9 Medicine, Université de Montréal, Montréal, H3C 3J7, Qc, Canada

10 \*Corresponding author: email– [panne@embl.fr](mailto:panne@embl.fr), tel: +33–476207925

11

12

13

14

## 15 **Summary**

16 Cytokine signalling is mediated by the activation of distinct sets of structurally homologous JAK  
17 and STAT signalling molecules, which control nuclear gene expression and cell fate. A  
18 significant expansion in the gene regulatory repertoire controlled by JAK/STAT signalling has  
19 arisen by the selective interaction of STATs with IRF transcription factors. Type I interferons  
20 (IFN), the major antiviral cytokines, trigger the formation of the ISGF3 complex containing  
21 STAT1, STAT2 and IRF9. ISGF3 regulates the expression of IFN-stimulated genes (ISGs).  
22 ISGF3 assembly depends on selective interaction between IRF9, through its IRF-association  
23 domain (IAD), with the coiled-coil domain (CCD) of STAT2. Here, we report the crystal  
24 structures of the IRF9-IAD alone and in a complex with STAT2-CCD. Despite similarity in the  
25 overall structure among respective paralogs, the surface features of the IRF9-IAD and STAT2-  
26 CCD have diverged to enable specific interaction between these family members, thus enabling  
27 ISGF3 formation and expression of ISGs.

28

## 29 **Introduction**

30 Cytokine signalling via the JAK-STAT pathway controls the development, differentiation and regulation  
31 of cells in the immune system and is frequently dysregulated in disease<sup>1</sup>. JAK-STAT signalling is  
32 mediated by four structurally related JAK kinases (JAK1, JAK2, JAK3, TYK2) and seven STAT  
33 (1, 2, 3, 4, 5a, 5b, 6) proteins<sup>2</sup>. A hallmark of cytokine signalling is functional redundancy and  
34 extensive pleiotropy, the ability of multiple cytokines to exert overlapping biological activities<sup>3,4</sup>.  
35 A critical question is how a limited number of JAK and STAT molecules enable such extensive

36 redundancy and pleiotropy and how gene duplication and divergence among STATs contributes  
37 to specificity in cytokine signalling.

38 JAK-mediated tyrosine phosphorylation of STATs induces dimerization and translocation to the  
39 nucleus where STATs bind the gamma activated sequence (GAS), a palindromic 9–11 base pair  
40 (bp) DNA element, 5'–TTCN<sub>2-4</sub>GAA–3' in the promoter of target genes<sup>2</sup>. An exception occurs  
41 in the response to type I and type III IFNs: These cytokines are rapidly induced during viral  
42 infection and stimulate activation of a complex termed ISGF3 (IFN-stimulated gene factor 3).  
43 ISGF3 contains a STAT1/STAT2 heterodimer which interacts with IRF9, a member of the IRF  
44 family of transcription factors<sup>5-8</sup>. Mammals contain ten IRF paralogs that typically bind to the  
45 consensus DNA sequence 5'–AANNGAAA–3'<sup>9-13</sup>. As a result of STAT and IRF complex  
46 formation, ISGF3 binds to a ~12–15 bp composite IFN-stimulated response DNA element  
47 (ISRE) 5'–G/ANGAAAN<sub>2</sub>GAAACT–3'. Thus the physical association of STATs with IRFs  
48 contributes to functional specificity in cytokine signalling and enables expression of IFN-  
49 stimulated genes (ISGs)<sup>6,14</sup>.

50 IRFs contain a conserved N-terminal DNA-binding domain and a C-terminal IRF-association  
51 domain (IAD; Fig. 1a). The IAD belongs to the SMAD/FHA domain superfamily<sup>15-17</sup>. IRF3 is  
52 the best-understood IRF family member. Signals emanating from pattern recognition receptors  
53 (PRR) activate the kinase TBK1 which phosphorylates latent IRF3<sup>13,18-20</sup>. This phosphorylation  
54 results in remodelling of an autoinhibitory segment in the IAD of IRF3, leading to dimerization  
55 and interaction with the transcriptional co-activators CBP/p300<sup>21</sup>. Although IRF9 contains a  
56 structurally related IAD, it does not share the same activation mechanism and co-activator  
57 preference with IRF3: IRF9 binds to STAT2 in both unstimulated and type I/III IFN-stimulated  
58 cells<sup>22-24</sup>. The interaction requires the IRF9-IAD and the coiled-coil domain (CCD) of STAT2<sup>23</sup>,

59 a domain that is conserved among STAT paralogs (Fig. 1a). Thus, despite conservation of the  
60 IRF9–IAD and the STAT2–CCD among their respective paralogs, only STAT2 and IRF9  
61 interact selectively.

62 To explore the molecular basis that enables selective IRF9–STAT2 interaction, we have  
63 determined the crystal structure of the IRF9–IAD in isolation and in complex with STAT2. As  
64 expected, the IRF9–IAD is closely related to IRF3. However, IRF9 lacks the structural elements  
65 involved in IRF3 autoinhibition thus explaining the different activation, co–factor and  
66 oligomerisation requirements. IRF9 binds through a hydrophobic patch on the convex side of the  
67 IAD to the tip of the STAT2–CCD. The binding interface is conserved in IRF9 and STAT2  
68 orthologs but is divergent in other IRF and STAT paralogs. Point–mutations in the conserved  
69 interface disrupt STAT2–IRF9 interaction *in vitro* and abolish ISGF3 activity in cells. Overall,  
70 our data reveal the molecular basis for selective IRF9 and STAT2 interaction. Comparative  
71 structural and biochemical analyses yield insights into how gene duplication, evolutionary drift  
72 and natural selection of STATs and IRFs resulted in expansion of the gene regulatory repertoire  
73 in cytokine signalling.

74

## 75 **Results**

### 76 **Biochemical basis for STAT2–IRF9 interaction**

77 STAT2 contains an N–domain (ND), a CCD, a DNA–binding domain (DBD), a linker domain  
78 (LD), an SH2 domain and a C–terminal transactivation domain (TAD) (Fig. 1a). Phosphorylation  
79 on Y690 enables dimerisation of STAT2<sup>5,25</sup>. IRF9 contains a N–terminal DBD and a C–terminal  
80 IAD connected by a flexible linker (Fig. 1a). Previous data show that the region spanning amino  
81 acids 148–324 of STAT2 and amino acids 217–377 of IRF9 are required for complex

82 formation<sup>8,23,26</sup>. To further delimit the interacting regions, we co-expressed STAT2<sub>133-738</sub> and  
83 full-length IRF9 (IRF9FL) and purified the complex to homogeneity. We found that IRF9FL co-  
84 purified with STAT2<sub>133-738</sub> (Fig. 1b, lane 1) and that a C-terminal fragment of IRF9 spanning  
85 182-399 was sufficient for STAT2 binding (Fig. 1b, lane 2). Limited proteolysis using Trypsin  
86 digestion resulted in C-terminal truncation of STAT2 at position 679 as revealed by LC-MS  
87 (Extended Data Fig.1a). This shows that the region beyond the SH2 domain is flexibly attached  
88 and is not required for complex formation. Co-expression of STAT2<sub>133-679</sub> with IRF9<sub>182-399</sub>  
89 resulted in a stable complex (Fig. 1b, lane 3). Analysis by size exclusion chromatography  
90 coupled to multi-angle laser light scattering (SEC-MALLS) showed a monodisperse complex  
91 with a molecular mass of  $86.8 \pm 0.7$  kDa, in agreement with the expected mass of a 1:1  
92 heterodimer (Fig. 1c). Chymotryptic digestion resulted in cleavage of the 14 terminal residues of  
93 IRF9, further delimiting the interacting region (Extended Data Fig.1b). Co-expression of  
94 STAT2<sub>133-679</sub> or of the coiled-coil segment STAT2<sub>133-315</sub> with IRF9<sub>182-385</sub> resulted in stable and  
95 monodisperse heterodimeric complexes (Fig. 1b, lane 4). We conclude that the minimal regions  
96 required for complex formation comprise STAT2<sub>133-315</sub> and IRF9<sub>182-385</sub>. Considering that ISGF3  
97 contains a single copy of STAT1 and STAT2<sup>27</sup>, we propose an overall 1:1:1 stoichiometry.  
98

### 99 **The IRF9-IAD lacks the autoinhibitory element and the PRR adapter binding site**

100 We obtained crystals of the IRF9<sub>182-385</sub> IAD, which diffracted to 1.9Å resolution, and determined  
101 the structure by molecular replacement. Our final model includes residues 197-385 of IRF9  
102 (Table 1). Like other IAD domains<sup>15,17,28</sup>, IRF9-IAD has a MH2 domain fold – a central β-  
103 sandwich core (β1-β10) flanked by a set of helices and loops (Fig. 1d). The domain has a  
104 crescent-like shape with a two-helix bundle (α2, α3) on one end, where the N- and C- termini

105 are located, and helix  $\alpha 1$  on the other end. While the  $\beta$ -sandwich core of the IAD domain is  
106 conserved among IRFs, the connecting secondary structures and loop regions vary: For example,  
107 IRF9 lacks the C-terminal tail of IRF3, constituted by the strands  $\beta 12$ ,  $\beta 13$  and helices  $\alpha 1$  and  
108  $\alpha 4$ , which autoinhibit IRF3 in the latent form (Fig. 1e). This C-terminal element of IRF3  
109 undergoes a conformational change from a buried, autoinhibitory configuration to an extended  
110 coil structure that leads to formation of a domain-swapped dimer upon TBK1-mediated  
111 phosphorylation (Extended Data Fig. 1c)<sup>21,29</sup>. The rearranged IAD of IRF3 thereby exposes a  
112 hydrophobic binding site for the coactivators CBP/p300 (Extended Data Fig. 1c). The missing  
113 autoinhibitory element of IRF9 renders the hydrophobic residues of helices  $\alpha 2$  and  $\alpha 3$  surface  
114 exposed (Fig. 1d-e).

115  
116 In IRF9, the region comprising the helix  $\alpha 1$ , strands  $\beta 9 - \beta 10$  and the connecting loop L5  
117 correspond to the binding of the pLxIS motif of phosphorylated PRR adaptors such as STING,  
118 MAVS, TRIF or alternatively, the phosphorylated C-terminal tail to form a loop-swapped dimer  
119 in IRF3 (Fig. 1e, Extended Data 1e)<sup>21</sup>. The extended structure of the strands  $\beta 9$ ,  $\beta 10$  and the  
120 connecting loop L5 in IRF9, abolish access to the PRR adaptor binding/dimerization site (Fig.  
121 1e). The lack of the PRR adaptor binding site and of the autoinhibitory/dimerisation element thus  
122 explains the different activation and oligomerisation properties of IRF9 as compared to IRF3 and  
123 other IRF family members.

124

### 125 **STAT2 binds to the convex surface on the IRF9-IAD**

126 To identify regions of IRF9 that are potentially involved in STAT2 binding, we compiled  
127 sequence alignments of IRF9 from divergent vertebrates and mapped the amino acid

128 conservation onto the IAD structure (Fig. 2a). We focused on conserved residues of the convex  
129 surface of the  $\beta$ -sandwich (IF1) and helix  $\alpha 2$  (IF2) and on residues of helix  $\alpha 2$  and  $\alpha 3$  (IF3), that  
130 are involved in CBP/p300 binding in IRF3. We mutated these three putative interfaces in IRF9  
131 and tested binding to STAT2 using a  $\text{Ni}^{2+}$ -affinity pull-down assay (Fig. 2b). Mutations in IF1  
132 reduced or completely abolished IRF9 interaction with STAT2 (Fig. 2b). These include IF1-A  
133 (R236E, F283A), IF1-B (R236E, L274A, F283A) or IF1-C (L233A, R236E, L274A F283A). In  
134 contrast, mutations in IF2 (R324E, D325K, Q331E, Q333E, P335S) or IF3 (L326A, F330A,  
135 I376A) retained STAT2 binding activity (Fig. 2b). Thus, our data suggest that STAT2 binds to  
136 the convex surface of the IRF9-IAD through residues in IF1.

137  
138 To analyse the impact of these mutants on STAT2-IRF9 interaction more quantitatively, we  
139 measured the equilibrium binding isotherms by isothermal titration calorimetry (ITC).  
140 STAT2<sub>133-679</sub> bound to the IRF9-IAD exothermically, with an equilibrium dissociation constant  
141 ( $K_d$ ) of 10 nM (Fig. 2c). As expected, the IF2 and IF3 mutants retained close to wild-type  
142 binding affinity (Table 2). The double mutant IF1-A and the triple mutant IF1-B had barely  
143 detectable STAT2 binding activity while binding of the quadruple mutant IF1-C was completely  
144 abolished (Fig. 2c, Extended Data Fig. 3a,b). Thus, our data indicates that the conserved residues  
145 in IF1 synergistically contribute to STAT2 binding. Previous studies have implicated a potential  
146 interaction between STAT1 and the C-terminus of IRF9 but the relevance for ISGF3 signalling  
147 has remained unclear<sup>8,23,30</sup>. We analysed the interaction between STAT1<sub>136-713</sub> and the IRF9-  
148 IAD by ITC and found an equilibrium dissociation constant,  $K_d$ , of 5  $\mu\text{M}$  (Fig. 2c, Table 2). The  
149 interaction with STAT1 is also mediated by the IF1 interface of IRF9 as the IF1-C mutant  
150 completely abolished STAT1 binding (Extended Data Fig. 3c). The 500-fold higher binding

151 affinity for STAT2 likely explains why IRF9 constitutively interacts with STAT2 but not STAT1  
152 in ISGF3 signalling<sup>23</sup>.

153

### 154 **Structure of the STAT2–IRF9 complex**

155 We obtained crystals of IRF9–IAD<sub>182–385</sub> in complex with the STAT2–CCD<sub>133–315</sub>, which  
156 diffracted to 2.7 Å resolution, and we determined the structure by molecular replacement (Table  
157 1). The production of diffraction–quality crystals required surface entropy reduction by  
158 introducing mutations Q242A and K243A in an exposed surface loop of STAT2. We located a  
159 single copy of the STAT2–CCD in the asymmetric unit bound to the convex side of the IRF9–  
160 IAD (Fig. 3a). The STAT2–CCD contains a four helix bundle with a left–handed twist similar to  
161 that of other STAT proteins including STAT1, 3 and 5 with which it superposes with a root–  
162 mean–square–deviation (rmsd) of between 2.7–2.9 Å for 151 aligned Cα atoms (Fig. 3g). As in  
163 other STATs, with the exception of STAT6, helices α1 and α2 extend beyond the core of the  
164 four helix bundle of the CCD. The β–sandwich core of the IRF9–IAD binds to this extension of  
165 α1 and α2 of STAT2 and buries 1040 Å<sup>2</sup> of surface area (Fig. 3a). The most significant  
166 contribution to the binding interface is made by contacts between α1 of STAT2 which packs  
167 against a shallow binding groove on the surface of the IRF9–IAD. STAT2 is the most divergent  
168 STAT family member, apparently due to frequent viral targeting which has driven STAT2  
169 divergence<sup>31</sup>. Inspection of amino acid conservation among 21 vertebrate STAT2 orthologs  
170 revealed a conserved patch on the surface of α1 (Fig. 3b). This patch, comprising residues D167,  
171 D170, V171, F174 and R175, faces directly into the STAT2–IRF9 binding interface. The lead  
172 anchoring residue is F174 which buries the largest solvent–accessible surface area (142 Å<sup>2</sup>)  
173 upon complex formation. F174 binds into a pocket on the surface of IRF9 (Fig. 3c).



174 Unsurprisingly, a F174D mutation completely abolished complex formation with IRF9  
175 (Extended Data Fig.3d). V171 and V178 are secondary anchoring residues and project into two  
176 hydrophobic pockets on IRF9. Additional interacting residues of STAT2 include D167, D170  
177 and R175 from helix  $\alpha$ 1 and Q194, and L197 from helix  $\alpha$ 2 which form hydrophobic  
178 interactions, van der Waals contacts and salt bridges with conserved surface residues in IRF9  
179 (Fig. 3c).

180

181 On IRF9, the interacting amino acids are L233, R236, S247, M248, L274, A276, N278, F283  
182 and Q285. The four conserved IRF9 amino acids L233, R236, L274 and F283, that are required  
183 for STAT2 binding (Fig. 2b,c), contribute a large fraction of the overall buried surface area in  
184 this interface. Residues L274, F283 together with A276, D234 and M278 line the pocket that  
185 binds F174 of STAT2.

186

187 The IRF9–IAD is closely related to those of IRF3–8 and superposes with the IADs of IRF3–  
188 IRF5 with an rmsd of between 2.7–2.9Å for 170 aligned C $\alpha$  atoms (Extended Data Fig.3g). Key  
189 residues that are involved in STAT2 interaction are conserved in IRF9 orthologs and explain  
190 binding selectivity. A critical amino acid residue of IRF9 is A276. A residue with a short side  
191 chain at this position is required for formation of the binding pocket for F174 of STAT2. The  
192 methyl group of A276 makes hydrophobic contacts with the side chain of F174 of STAT2 and is  
193 completely buried upon complex formation. A276 is replaced by a bulky amino acid in other  
194 IRFs (Fig. 3f, Extended Data Fig.2). As a result, the binding pocket is absent in other IRFs thus  
195 preventing association of STAT2 (Extended Data Fig.3g). Hydrophobic pockets of IRF9 that  
196 accommodate the secondary anchoring residues V171 and V178 of STAT2 are also missing in

197 other IRFs (Extended Data Fig.3g). Comparison of IRF9 in the free and STAT2-bound state  
198 shows the conformational rearrangements of IRF9 upon STAT2 binding (Extended Data Fig.3h).  
199 Loop L2 is displaced to accommodate STAT2 on the shallow binding groove of IRF9. This  
200 binding groove is occluded in other IRFs due to a longer L2 loop that projects into the binding  
201 site (Extended Data Fig.2, Extended Data Fig.3h). In short, despite sharing a similar overall  
202 structure with other IRFs, the surface features of the IRF9-IAD have diverged to enable specific  
203 recognition of STAT2.

204  
205 Sequence comparison of STATs shows that F174, the lead-anchoring residue for IRF9 binding  
206 of STAT2, is conserved in STAT1 and STAT3 but divergent in other paralogs (Fig. 3e). This  
207 likely explains why STAT1 can interact with IRF9<sup>8</sup>. The 500-fold lower binding affinity of  
208 STAT1 for IRF9 (Fig. 2c) is due to divergence of the secondary anchoring residues V171 and  
209 V178. In particular, the negatively charged amino acid residues that replace V171 in STAT1 and  
210 STAT3 would clash with hydrophobic residues of IRF9. To demonstrate the importance of this  
211 interaction, we introduced a V171E mutation in STAT2 and found a 250-fold increased  $K_d$   
212 (from 10 nM to 2.5  $\mu$ M) for IRF9 binding (Extended Data Fig. 3e). Conversely, introduction of  
213 E169V into STAT1 resulted in a more than 40-fold reduced  $K_d$  (from 5  $\mu$ M to 116 nM;  
214 Extended Data Fig. 3a). Together, while association between STAT2 and IRF9 is driven by F174  
215 of STAT2, the secondary anchor residues and in particular V171 are critical for high binding  
216 affinity and specificity of the interaction.

217

### 218 **Effects of point mutations on ISGF3 activity**

219 To further analyse the physiological relevance of the IRF9-STAT2 interface for ISGF3 function

220 in cells, we introduced mutations into FLAG-tagged IRF9 and tested their interaction with HA-  
221 STAT2 in HEK293 cells and the impact on ISGF3 activity using an *IFIT1* promoter luciferase  
222 reporter (*IFIT1*prom-Luc) in IRF9<sup>-/-</sup>/IRF-3<sup>-/-</sup> MEFs. While IRF9wt was able to robustly Co-  
223 immunoprecipitate with STAT2 (Fig. 4a, lane 2), the interaction was reduced to background  
224 levels with the IRF9 IF1-A, IF1-B or the IF1-C mutants (Fig. 4a, lanes 3-5). IRF9 IF1-D, a  
225 variant containing the mutations L233A, L274A, F283A also did not bind STAT2 (Fig. 4a, lane  
226 6). As the IF1 mutations were sufficient to disrupt the interaction between full-length STAT2  
227 and IRF9 *in vivo*, we conclude that the identified binding interface is necessary and sufficient for  
228 this interaction.

229

230 The luciferase reporter assay showed, as expected, IFN $\beta$  induced *IFIT1*prom-Luc activity in  
231 cells reconstituted with FLAG-IRF9wt (Fig. 4b, Extended Data, Fig. 4a). However, cells  
232 expressing the IF1 mutants exhibited only partial (IF1-A and IF1-B) or no (IF1-C) *IFIT1*prom-  
233 Luc activity in response to IFN $\beta$ . The progressive loss of activity observed with IRF9 mutants,  
234 IF1-A>IF1-B>IF1-C correlates with our *in vitro* binding studies (Fig. 2b). Not surprisingly,  
235 the IF1-D variant, also did not show *IFIT1*prom-Luc activity (Fig. 4b). Overall, our results show  
236 that mutations to the conserved surface patch disrupt IRF9-STAT2 interaction and abolish  
237 ISGF3 function in cells.

238

### 239 **Solution structure of STAT2-IRF9 and model of the ISGF3 complex**

240 We also examined the architecture of the STAT2-IRF9 complex in solution by cross-  
241 linking/mass spectrometry (XL-MS) and size-exclusion chromatography in line with small-  
242 angle X-ray scattering (SEC-SAXS). We focused on a STAT2-IRF9 complex containing an

243 extended STAT2<sub>133–679</sub> construct spanning from the CCD to the SH2 domain. XL–MS showed  
244 intermolecular crosslinks between K183 in STAT2–CCD and K318 or K381 of IRF9–IAD, in  
245 agreement with our structure (Extended Data Fig. 4b). The SAXS scattering curve allowed us to  
246 determine the radius of gyration ( $R_g$ ) of  $4.37 \pm 0.02$  nm while the distance distribution function  
247  $p(r)$  showed a curve characteristic of an elongated particle with a maximum diameter of  $14.4 \pm 0.3$   
248 nm (Extended Data Fig. 4c,d and inset). These data allowed rigid body modelling of STAT2<sub>133–</sub>  
249 <sub>679</sub> spanning from CCD to SH2 domain in complex with the IRF9–IAD (Extended Data Fig. 4b).  
250 The resulting model represented a good fit to the experimental data (Extended Data Fig. 4c).  
251 Based on this model, together with available structures of DNA–bound STAT1 and IRF dimers,  
252 we propose a composite model for ISGF3, containing a 1:1:1 complex of STAT1:STAT2 and  
253 IRF9 bound to ISRE DNA (Fig. 4c). In this model, the IRF9–IAD is attached to the STAT2–  
254 CCD and is linked by a flexible linker spanning residues 112–198 to the IRF9–DBD. STAT1  
255 occupies the first and the IRF9–DBD the second 5'–GAAA–3' repeat in the major groove on  
256 opposite sides of the DNA. This positions STAT2 upstream on the same face of the ISRE DNA  
257 as the IRF9–DBD, thus explaining DNA–binding specificity of ISGF3.

258

## 259 **Discussion**

260 STATs and IRFs have arisen by gene duplication, evolutionary drift and natural selection under  
261 constant selective pressure from pathogen infection<sup>13,32,33</sup>. The direct interaction between STAT2  
262 and IRF9 is critical for the function of ISGF3 and the antiviral response<sup>23</sup>. Our studies show that  
263 the overall architecture of these domains is similar to that of other STAT and IRF paralogs.  
264 However there are several important adaptations: The IRF9–IAD is missing the regulatory  
265 apparatus that is used for IRF autoinhibition in the latent form and that in the activated state

266 enables IRF dimerization and interaction with the transcriptional co-activators CBP/p300<sup>15,17</sup>. In  
267 addition, the PRR adaptor-binding site that enables PRR-signal-dependent activation of IRF3 is  
268 absent in IRF9. IRF9 binds to the tip of the STAT2-CCD using the convex surface of the  $\beta$ -  
269 sandwich core of the IAD domain. While the same surface is available in other IRF paralogs,  
270 amino acid substitutions at the key anchoring points account for the preferential STAT2 binding.  
271 Together, these adaptations explain why IRF9 binds constitutively and selectively to STAT2<sup>23</sup>.

272 The STAT2-CCD is closely related to that of that of other STATs, with the exception of STAT6,  
273 which is missing the IRF9 binding site entirely. The lead-anchoring residue of STAT2, F174, is  
274 conserved in STAT1 and STAT3. Amino acid residues at this position are critical for stabilizing  
275 an ‘antiparallel’ and apparently inactive dimer structure of STAT1 (F172) and STAT5 (I174) and  
276 thus play an important role in the STAT activation and inactivation cycle<sup>34,35</sup> (Fig. 3e). The  
277 secondary anchoring residues V171 and V178 of STAT2 are divergent. Due to this divergence,  
278 STAT1 binds with 500-fold weaker affinity to IRF9 as compared to STAT2, contributing to  
279 differential binding energetics. Previous studies have reported an interaction between STAT1  
280 and IRF9 under certain experimental conditions<sup>8</sup>, which is likely due to this residual binding  
281 affinity between STAT1 and IRF9. However other experiments could not reproduce these  
282 results<sup>23</sup>. Nevertheless, STAT1 and IRF9 appear to interact functionally on certain promoters  
283 even in the absence of STAT2<sup>36,37</sup>. Overall, our data shows that IRF9 selectively and  
284 constitutively interacts with STAT2, but only weakly with STAT1.

285 Together, functional divergence of the STAT and IRF paralogs is due to amino acid substitutions  
286 at key anchoring points in the binding interface that enable select family members (STAT2-  
287 IRF9) to interact with high affinity and thereby restricting interaction between other STAT and  
288 IRF paralogs. Our study thus provides evidence for how gene duplication and divergence can

289 contribute to the evolution of tightly integrated systems by slight structural variation of key  
290 amino acids of primordial variants. These variations resulted in new protein–protein interactions  
291 that enable a significant increase in the regulatory repertoire of the mammalian cytokine  
292 response.

293

## 294 **Methods**

### 295 **Constructs, Expression and Purification**

296 Sequences encoding murine IRF9, STAT1 and STAT2 and any variants described in the text,  
297 were amplified by PCR from cDNA clones, and inserted between the *NcoI* and *HindIII* sites in  
298 the first open reading frame (ORF) of pETDuet vector. Co–expression was achieved by cloning  
299 respective cDNA into the second ORF between *NdeI* and *KpnI* sites. Mutants of IRF9 were  
300 generated using the QuikChange site–directed mutagenesis kit (Agilent). Sequences of all  
301 expression constructs were confirmed by DNA sequencing. Individual proteins and protein  
302 complexes were expressed in *E.coli* BL21 (DE3) cells and induced with IPTG. Upon reaching an  
303  $OD_{600nm}=0.6$ , *E.coli* cultures were shifted from a temperature of 37 °C to 16 °C, for 12 hours.  
304 Cells were pelleted at 9000 *g* (JLA–8.1, Beckman) followed by resuspension in buffer A (20 mM  
305 HEPES pH 7.5, 300 mM NaCl and 0.5 mM TCEP) containing 10 mM imidazole supplemented  
306 with protease inhibitors (Roche), and lysed using a microfluidiser (Microfluidics). Lysates were  
307 centrifuged at 24000 *g* for 30 minutes, using a JA–25.5 rotor (Beckman), and the resultant  
308 supernatant passed over Ni<sup>2+</sup>–conjugated IMAC sepharose resin (GE Healthcare). Columns were  
309 subsequently washed using buffer A containing 20 mM imidazole, and eluted with buffer A  
310 containing 500 mM Imidazole. For all purifications involving His–TEV proteins the Ni<sup>2+</sup> eluate  
311 was incubated overnight at 4 °C with His–tagged TEV protease, during dialysis against buffer A

312 with 20 mM imidazole. Cleaved tags, TEV protease and uncleaved protein were removed by  
313 subtractive purification over Ni<sup>2+</sup> resin. All proteins were further purified by SEC using a  
314 HiLoad 16/60 Superdex 200 prep-grade column (GE Healthcare) equilibrated in buffer A.

315

### 316 **Limited proteolysis**

317 To identify stable variants of STAT2 and IRF9 we performed limited proteolysis by Trypsin and  
318  $\alpha$ -chymotrypsin. The purified STAT2<sub>133-738</sub>-IRF9<sub>182-399</sub> complex (120  $\mu$ g) was titrated against  
319 decreasing concentrations of Trypsin ranging from a ratio of 1:125 to 1:1000 (w/w) and  
320 incubated for up to 30 minutes at 4 °C. The samples were then analysed by SDS-PAGE, acid  
321 hydrolysis and mass spectrometry. The stable STAT2<sub>133-679</sub>-IRF9<sub>182-399</sub> (120  $\mu$ g) complex  
322 identified by trypsin digestion was further proteolysed by  $\alpha$ -chymotrypsin for 72 hours at a ratio  
323 of 1:5000 (w/w) at 4 °C. The fragments were analysed as above.

324

### 325 **Crystallisation**

326 Initial trails of IRF9<sub>182-385</sub> yielded crystals with inherent pathologies like twinning, translational  
327 pseudo-symmetry and high copy number. To overcome these problems, we mutated surface  
328 residues to induce alternate crystal packing. An E348A mutant yielded crystals in 0.1 M HEPES  
329 pH 6.8, 1.5 M Ammonium phosphate monobasic and 0.1 M Ammonium sulphate that diffracted  
330 to a minimum Bragg spacing of 1.9 Å. Production of diffraction quality crystals of the STAT2-  
331 IRF9 complex also required mutation of surface residues Q242A and K243A of STAT2 and of  
332 E347A and E348A of IRF9. Crystals of the STAT2-IRF9 complex (10 mg ml<sup>-1</sup>) were obtained  
333 in 0.2M Potassium formate and 20% PEG3350. These were further optimised by microseeding,  
334 yielding crystals that diffracted to 2.7 Å resolution. 25% glycerol was used as a cryo-protectant

335 before flash cooling in liquid nitrogen. IRF9–IAD diffraction data were collected at 100 K at an  
336 X–ray wavelength of 0.966 Å at beamline ID30A–1 (MASSIF–1) of the European Synchrotron  
337 Radiation Facility (ESRF, Grenoble, France) with a Pilatus 6M–F detector<sup>38</sup>. Diffraction data for  
338 crystals of the STAT2–IRF9 complex were collected at a wavelength of 0.972 Å at the beamline  
339 ID23–1 of ESRF with a Pilatus 6M–F detector. Indexing and scaling of the data was performed  
340 with XDS and XSCALE<sup>39</sup>. The structure was solved by molecular replacement using the IRF5–  
341 IAD (PDB; 3DSH) structure as a search model<sup>40</sup>. STAT2–IRF9 data was indexed with XDS and  
342 scaled using AIMLESS<sup>41</sup>. The structure of the IRF9–IAD and STAT1–CCD (PDB; 1BF5) were  
343 used as search models for molecular replacement. Final models were produced by iterative  
344 rounds of automatic and manual model building and refinement, using Coot and PHENIX<sup>42,43</sup>.  
345 The final IRF9–IAD model contained residues 197–385 and was refined to a resolution of 1.9 Å  
346 with an  $R_{\text{work}}$  and an  $R_{\text{free}}$  of 20.6% and 24.2%, respectively (Table 1). Analysis of the refined  
347 structure in MolProbity showed that there are no residues in disallowed regions of the  
348 Ramachandran plot. The MolProbity all atom clash score was 4.7 placing the structure in the  
349 97th (best) percentile of structures ( $n = 773$ ) refined at comparable resolution<sup>44</sup>. The final  
350 STAT2–IRF9 model contained residues 141–315 of STAT2 and 206–376 of IRF9 and was  
351 refined to a resolution of 2.7 Å with  $R_{\text{work}}$  and an  $R_{\text{free}}$  of 22.9% and 29.6%, respectively  
352 (Table1). The MolProbity all atom clash score was 0.37 placing the structure in the 100<sup>th</sup> (best)  
353 percentile of structures ( $n = 175$ ). Figures displaying the structures were generated using  
354 PyMol<sup>45</sup>.

355

356 **SEC–MALLS and SAXS analysis**



357 SEC was performed at 20 °C with a Superdex 200 10/300 GL column (GE Healthcare)  
358 equilibrated in buffer A. Fifty  $\mu$ l of STAT2<sub>133–679</sub>/IRF9–IAD was injected at 7 mg/ml and the  
359 sample eluted at a flow rate of 0.5 ml/min. Multi angle laser light scattering was recorded with a  
360 laser emitting at 690 nm using a DAWN–EOS detector (Wyatt TechnologyCorp. Santa Barbara,  
361 CA). The refractive index was measured using a RI2000 detector (Schambeck SFD). Data  
362 analysis was performed with the ASTRA software (Wyatt TechnologyCorp. Santa Barbara, CA).  
363 The averaged molecular weight represents the measurements across the elution peak.

364  
365 X–ray scattering data were collected using an inline HPLC setup, at the Bio–SAXS beamline  
366 (BM29) of the European Synchrotron Radiation Facility. Inline size–exclusion chromatography  
367 was performed at a temperature of 10°C using a Superdex Increase 200 10/300 GL column  
368 equilibrated in SEC buffer. Data were collected with a photon–counting Pilatus 1M detector at a  
369 sample–detector distance of 2.86 m, a wavelength of  $\lambda = 0.991 \text{ \AA}$  and an exposure time of 1  
370 second/frame. A momentum transfer range of 0.008 to 0.47  $\text{\AA}^{-1}$  was covered ( $q = 4\pi \sin\theta/\lambda$ ,  
371 where  $\theta$  is the scattering angle and  $\lambda$  the X–ray wavelength). Data collected across the peak were  
372 subtracted from buffer scattering and the frames 1904 to 2264 showing a constant radius of  
373 gyration ( $R_g$ ) were merged for further analysis.  $R_g$  values were obtained from the Guinier  
374 approximation  $sR_g < 1.3$  using Primus<sup>46</sup>. Distance distribution functions  $p(r)$  and the Porod  
375 volumes  $V_p$  were computed from the entire scattering curve using GNOM<sup>46</sup>. CORAL from the  
376 ATSAS suite was used to model the STAT2<sub>133–679</sub>–IRF9–IAD complex using the STAT2<sub>133–</sub>  
377 <sub>679</sub>:IRF9–IAD homology model and the IRF9–IAD structure as the input files. The final model  
378 conforms well to the scattering data with a  $\chi^2=1.64$ . The model for the ISGF3 complex bound  
379 to a ISRE DNA sequence 5'–GGGAAATGGAAACT–3' was obtained by positioning a STAT1

380 dimer bound to a GAS DNA sequence (PDB; 1BG5) on the first 5'–GGAA–3' repeat. A  
381 homology model of the IRF9–DBD was positioned on the second GAAA repeat based on the  
382 structure of DNA–bound IRF3 (PDB; 1T2K). The final model was obtained by overlaying the  
383 STAT2–IRF9 complex onto the distal copy of the STAT1 dimer.

384

### 385 **Crosslinking mass spectrometry**

386 Crosslinking was performed using the STAT2<sub>133–679</sub>/IRF9–IAD complex by incubating with  
387 isotope–labelled disuccinimidyl suberate (DSS) as described previously<sup>47</sup>. Protein digestion was  
388 performed at 37°C with LysC for 4 hrs followed by trypsin digestion overnight; digested peptides  
389 were enriched by SEC. Fractions were injected onto a nanoAcquity ultraperformance liquid  
390 chromatography column connected to a LTQ Orbitrap Velos Pro instrument (Thermo Scientific)  
391 for liquid chromatography based mass spectrometry measurements. Data processing was  
392 performed using xQuest/xProphet. Identified crosslinks were mapped onto the SAXS model of  
393 the STAT2<sub>133–679</sub>/IRF9–IAD heterodimer and analysed using Xlink analyzer<sup>48</sup>.

394

### 395 **Isothermal titration calorimetry**

396 Proteins were extensively dialysed against ITC buffer (20 mM Hepes pH 7.5, 300 mM NaCl, 2%  
397 glycerol) and subjected to calorimetry using a MicroCal ITC200 system (Malvern Instruments).  
398 STAT2<sub>133–679</sub> at 30 µM, was titrated with different IRF9–IAD variants at concentrations ranging  
399 from 150 µM to 320 µM. For IRF9–IADwt, titrations were carried out by injection of 1.5 µl of  
400 IRF9–IAD (ITC200) every 180s into the sample cell containing STAT2<sub>133–679</sub> variants. For  
401 mutant IRF9–IAD, 16 successive injections of 2.5 µl were done every 240s. STAT1<sub>136–713</sub>  
402 variants or STAT2<sub>133–679</sub> V171E were titrated against IRF9–IAD every 120s for 20 injections.

403 Enthalpy change data for titrations were double background corrected via subtraction of protein  
404 into buffer measurement. The data were fit using MicroCal Origin 7.0 software (OriginLab).

405

#### 406 **Cell culture**

407 All media and supplements were from Gibco, except where indicated. IRF9<sup>-/-</sup>/IRF3<sup>-/-</sup> MEFs,  
408 kindly provided by Dr. K. Mossman, McMaster University, Hamilton, Canada), were  
409 immortalized using the 3T3 protocol and cultured in MEM medium supplemented with non-  
410 essential amino acid, sodium pyruvate, 1% L-glutamine and 10% heat-inactivated fetal bovine  
411 serum (HI-FBS). HEK293 cells (ATCC) were cultured in DMEM medium containing 1% L-  
412 glutamine and 10% Fetalclone III (Hyclone). All cultures were performed without antibiotics and  
413 controlled for the absence of mycoplasma contamination using the MycoAlert Mycoplasma  
414 Detection Kit (Lonza).

415

#### 416 **Luciferase reporter assays**

417 MEF cells were cotransfected with the pRL-null Renilla (*Renilla* luciferase, internal control), the  
418 *IFIT1*prom-pGL3 firefly luciferase reporter<sup>49</sup> and the indicated Flag-IRF9wt or mutant  
419 expression plasmid using the TransIT-LT1 transfection reagent (Mirus). At 8h post-transfection,  
420 cells were stimulated for 16h with 200U/mL murine IFN $\beta$  (PBL Assay Science) Luciferase  
421 activities were quantified using the dual luciferase reporter assay kit (Promega). Relative  
422 luciferase activities were calculated as the *firefly* luciferase/*Renilla* ratio. Protein extracts were  
423 subjected to SDS-PAGE electrophoresis and analysed by immunoblot using the anti-Flag M2  
424 (F1804, Sigma-Aldrich) and anti-actin (A5441, Sigma-Aldrich) antibodies. Immunoreactive

425 bands were visualized using the Western Lightning Chemiluminescence Reagent Plus (Perkin  
426 Elmer Life Sciences) acquired on an ImageQuant LAS 4000mini apparatus (GE Healthcare).

427

### 428 **Co-immunoprecipitation**

429 HEK293 cells were transfected with FLAG-IRF9wt or mutants together with HA-STAT2  
430 encoding plasmids using the calcium phosphate method. Cells were lysed by sonication in 50  
431 mM Hepes pH 7.4, 150 mM NaCl, 5 mM EDTA, 10% Glycerol, 1% Triton, 10 µg/mL aprotinin,  
432 10 µg/mL leupeptin, 5 mM NaF, 1 mM activated Na<sub>3</sub>VO<sub>4</sub>, 2 mM p-nitrophenyl phosphate and  
433 10 mM β-glycerophosphate pH 7.5. Cell lysates (1mg) were subjected to immunoprecipitation  
434 using 2 µg anti-Flag M2 antibodies (F1804, Sigma-Aldrich) for 3h at 4 °C. Elution of  
435 immunocomplexes was performed by incubation on ice for 2h in lysis buffer containing 100  
436 µg/ml FLAG-peptide (F3290, Sigma-Aldrich). Immunocomplexes were analyzed by  
437 immunoblot using the anti-FLAG M2 (F1804, Sigma-Aldrich), anti-HA (ab9110, Abcam) and  
438 anti-actin (A5441, Sigma-Aldrich) antibodies as described above.

439

440 **Data availability.** Coordinates for the IRF9–IAD and the IRF9–STAT2 complex are available  
441 from the Protein Data Bank under accession number xxx and xxx, respectively.

442

## 443 References

- 444 1. Stark, G.R. & Darnell, J.E., Jr. The JAK-STAT pathway at twenty. *Immunity* **36**, 503-14  
445 (2012).
- 446 2. Levy, D.E. & Darnell, J.E., Jr. Stats: transcriptional control and biological impact. *Nat*  
447 *Rev Mol Cell Biol* **3**, 651-62 (2002).
- 448 3. Paul, W.E. & Seder, R.A. Lymphocyte responses and cytokines. *Cell* **76**, 241-51 (1994).
- 449 4. Kishimoto, T., Taga, T. & Akira, S. Cytokine signal transduction. *Cell* **76**, 253-62 (1994).
- 450 5. Schindler, C., Shuai, K., Prezioso, V.R. & Darnell, J.E., Jr. Interferon-dependent tyrosine  
451 phosphorylation of a latent cytoplasmic transcription factor. *Science* **257**, 809-13 (1992).
- 452 6. Levy, D.E., Kessler, D.S., Pine, R., Reich, N. & Darnell, J.E., Jr. Interferon-induced  
453 nuclear factors that bind a shared promoter element correlate with positive and negative  
454 transcriptional control. *Genes Dev* **2**, 383-93 (1988).
- 455 7. Fu, X.Y., Kessler, D.S., Veals, S.A., Levy, D.E. & Darnell, J.E., Jr. ISGF3, the  
456 transcriptional activator induced by interferon alpha, consists of multiple interacting  
457 polypeptide chains. *Proc Natl Acad Sci U S A* **87**, 8555-9 (1990).
- 458 8. Horvath, C.M., Stark, G.R., Kerr, I.M. & Darnell, J.E., Jr. Interactions between STAT  
459 and non-STAT proteins in the interferon-stimulated gene factor 3 transcription complex.  
460 *Mol Cell Biol* **16**, 6957-64 (1996).
- 461 9. Escalante, C.R., Yie, J., Thanos, D. & Aggarwal, A.K. Structure of IRF-1 with bound  
462 DNA reveals determinants of interferon regulation. *Nature* **391**, 103-6 (1998).
- 463 10. Furui, J. et al. Solution structure of the IRF-2 DNA-binding domain: a novel subgroup of  
464 the winged helix-turn-helix family. *Structure* **6**, 491-500 (1998).
- 465 11. Takahasi, K. et al. X-ray crystal structure of IRF-3 and its functional implications. *Nat*  
466 *Struct Biol* **10**, 922-7 (2003).
- 467 12. Panne, D., Maniatis, T. & Harrison, S.C. An atomic model of the interferon-beta  
468 enhanceosome. *Cell* **129**, 1111-23 (2007).
- 469 13. Yanai, H., Negishi, H. & Taniguchi, T. The IRF family of transcription factors:  
470 Inception, impact and implications in oncogenesis. *Oncoimmunology* **1**, 1376-1386  
471 (2012).
- 472 14. Reich, N. et al. Interferon-induced transcription of a gene encoding a 15-kDa protein  
473 depends on an upstream enhancer element. *Proc Natl Acad Sci U S A* **84**, 6394-8 (1987).
- 474 15. Qin, B.Y. et al. Crystal structure of IRF-3 reveals mechanism of autoinhibition and virus-  
475 induced phosphoactivation. *Nat Struct Biol* **10**, 913-21 (2003).
- 476 16. Hiscott, J. & Lin, R. IRF-3 releases its inhibitions. *Structure* **13**, 1235-6 (2005).
- 477 17. Chen, W. et al. Insights into interferon regulatory factor activation from the crystal  
478 structure of dimeric IRF5. *Nat Struct Mol Biol* **15**, 1213-20 (2008).
- 479 18. Takeuchi, O. & Akira, S. Pattern recognition receptors and inflammation. *Cell* **140**, 805-  
480 20 (2010).
- 481 19. Ablasser, A. et al. cGAS produces a 2'-5'-linked cyclic dinucleotide second messenger  
482 that activates STING. *Nature* (2013).
- 483 20. Kato, H., Takahasi, K. & Fujita, T. RIG-I-like receptors: cytoplasmic sensors for non-self  
484 RNA. *Immunol Rev* **243**, 91-8 (2011).
- 485 21. Zhao, B. et al. Structural basis for concerted recruitment and activation of IRF-3 by  
486 innate immune adaptor proteins. *Proc Natl Acad Sci U S A* **113**, E3403-12 (2016).

- 487 22. Banninger, G. & Reich, N.C. STAT2 nuclear trafficking. *J Biol Chem* **279**, 39199-206  
488 (2004).
- 489 23. Martinez-Moczygemba, M., Gutch, M.J., French, D.L. & Reich, N.C. Distinct STAT  
490 structure promotes interaction of STAT2 with the p48 subunit of the interferon-alpha-  
491 stimulated transcription factor ISGF3. *J Biol Chem* **272**, 20070-6 (1997).
- 492 24. Kraus, T.A., Lau, J.F., Parisien, J.P. & Horvath, C.M. A hybrid IRF9-STAT2 protein  
493 recapitulates interferon-stimulated gene expression and antiviral response. *J Biol Chem*  
494 **278**, 13033-8 (2003).
- 495 25. Improtta, T. et al. Transcription factor ISGF-3 formation requires phosphorylated Stat91  
496 protein, but Stat113 protein is phosphorylated independently of Stat91 protein. *Proc Natl*  
497 *Acad Sci U S A* **91**, 4776-80 (1994).
- 498 26. Veals, S.A., Santa Maria, T. & Levy, D.E. Two domains of ISGF3 gamma that mediate  
499 protein-DNA and protein-protein interactions during transcription factor assembly  
500 contribute to DNA-binding specificity. *Mol Cell Biol* **13**, 196-206 (1993).
- 501 27. Qureshi, S.A., Salditt-Georgieff, M. & Darnell, J.E., Jr. Tyrosine-phosphorylated Stat1  
502 and Stat2 plus a 48-kDa protein all contact DNA in forming interferon-stimulated-gene  
503 factor 3. *Proc Natl Acad Sci U S A* **92**, 3829-33 (1995).
- 504 28. Remesh, S.G., Santosh, V. & Escalante, C.R. Structural Studies of IRF4 Reveal a  
505 Flexible Autoinhibitory Region and a Compact Linker Domain. *J Biol Chem* **290**, 27779-  
506 90 (2015).
- 507 29. Panne, D., McWhirter, S.M., Maniatis, T. & Harrison, S.C. Interferon regulatory factor 3  
508 is regulated by a dual phosphorylation-dependent switch. *J. Biol. Chem.* **282**, 22816-22  
509 (2007).
- 510 30. Bluysen, H.A. et al. Combinatorial association and abundance of components of  
511 interferon-stimulated gene factor 3 dictate the selectivity of interferon responses. *Proc*  
512 *Natl Acad Sci U S A* **92**, 5645-9 (1995).
- 513 31. Chowdhury, F.Z. & Farrar, J.D. STAT2: A shape-shifting anti-viral super STAT.  
514 *JAKSTAT* **2**, e23633 (2013).
- 515 32. Liongue, C., O'Sullivan, L.A., Trengove, M.C. & Ward, A.C. Evolution of JAK-STAT  
516 pathway components: mechanisms and role in immune system development. *PLoS One*  
517 **7**, e32777 (2012).
- 518 33. Randall, R.E. & Goodbourn, S. Interferons and viruses: an interplay between induction,  
519 signalling, antiviral responses and virus countermeasures. *J Gen Virol* **89**, 1-47 (2008).
- 520 34. Mao, X. et al. Structural bases of unphosphorylated STAT1 association and receptor  
521 binding. *Mol Cell* **17**, 761-71 (2005).
- 522 35. Neculai, D. et al. Structure of the unphosphorylated STAT5a dimer. *J Biol Chem* **280**,  
523 40782-7 (2005).
- 524 36. Majumder, S. et al. p48/STAT-1alpha-containing complexes play a predominant role in  
525 induction of IFN-gamma-inducible protein, 10 kDa (IP-10) by IFN-gamma alone or in  
526 synergy with TNF-alpha. *J Immunol* **161**, 4736-44 (1998).
- 527 37. Rauch, I. et al. Noncanonical Effects of IRF9 in Intestinal Inflammation: More than Type  
528 I and Type III Interferons. *Mol Cell Biol* **35**, 2332-43 (2015).
- 529 38. Svensson, O., Malbet-Monaco, S., Popov, A., Nurizzo, D. & Bowler, M.W. Fully  
530 automatic characterization and data collection from crystals of biological  
531 macromolecules. *Acta Crystallogr D Biol Crystallogr* **71**, 1757-67 (2015).
- 532 39. Kabsch, W. Xds. *Acta Crystallogr D Biol Crystallogr* **66**, 125-32 (2010).

- 533 40. McCoy, A.J. et al. Phaser crystallographic software. *J Appl Crystallogr* **40**, 658-674  
534 (2007).
- 535 41. Winn, M.D. et al. Overview of the CCP4 suite and current developments. *Acta*  
536 *Crystallogr D Biol Crystallogr* **67**, 235-42 (2011).
- 537 42. Emsley, P. & Cowtan, K. Coot: model-building tools for molecular graphics. *Acta*  
538 *Crystallogr D Biol Crystallogr* **60**, 2126-32 (2004).
- 539 43. Adams, P.D. et al. The Phenix software for automated determination of macromolecular  
540 structures. *Methods* **55**, 94-106 (2011).
- 541 44. Chen, V.B. et al. MolProbity: all-atom structure validation for macromolecular  
542 crystallography. *Acta Crystallogr D Biol Crystallogr* **66**, 12-21 (2010).
- 543 45. DeLano, W.L. The PyMOL Molecular Graphics System *DeLano Scientific* San Carlos,  
544 USA (2002).
- 545 46. Petoukhov, M.V. et al. New developments in the program package for small-angle  
546 scattering data analysis. *J Appl Crystallogr* **45**, 342-350 (2012).
- 547 47. Herzog, F. et al. Structural probing of a protein phosphatase 2A network by chemical  
548 cross-linking and mass spectrometry. *Science* **337**, 1348-52 (2012).
- 549 48. Kosinski, J. et al. Xlink Analyzer: software for analysis and visualization of cross-linking  
550 data in the context of three-dimensional structures. *J Struct Biol* **189**, 177-83 (2015).
- 551 49. Grandvaux, N. et al. Transcriptional profiling of interferon regulatory factor 3 target  
552 genes: direct involvement in the regulation of interferon-stimulated genes. *J Virol* **76**,  
553 5532-9. (2002).
- 554 50. Thompson, J.D., Higgins, D.G. & Gibson, T.J. CLUSTAL W: improving the sensitivity  
555 of progressive multiple sequence alignment through sequence weighting, position-  
556 specific gap penalties and weight matrix choice. *Nucleic Acids Res* **22**, 4673-80 (1994).
- 557 51. Gouet, P., Robert, X. & Courcelle, E. ESPript/ENDscript: Extracting and rendering  
558 sequence and 3D information from atomic structures of proteins. *Nucleic Acids Res* **31**,  
559 3320-3 (2003).

560

561

562

563

564

565

566

567

568

569

570 **Acknowledgements**

571 This work was supported by a grant from the Natural Sciences and Engineering Research  
572 Council of Canada (NSERC, #355306) to NG. SR is a fellow of Foundation ARC pour la  
573 recherche sur le Cancer, France. NG is recipient of a Research Chair in signaling in virus  
574 infection and oncogenesis from Université de Montréal. We thank the staff at the ESRF  
575 beamlines BM29, ID30a–1,3 (MASSIF) for their support during data collection. We thank  
576 Joanna Kirkpatrick and the proteomic core facility at EMBL for processing and analysis of  
577 crosslinked samples. We thank the Partnership for Structural Biology (Grenoble) for providing  
578 access to their biophysical platform. We thank Dr. K. Mossman (McMaster University) for the  
579 MEF cells used in this study and Dr. Thomas Decker (Max F. Perutz Laboratories, University of  
580 Vienna) for comments on the manuscript.

581

582

583 **Author contributions**

584 S.R., S.G, J.D. and E.C. performed the experiments. S.R., E.C., N.G., and D.P. designed  
585 experiments and analysed data. S.R. and D.P. wrote the manuscript.

586

587



588  
589

**Table 1: Xray data collection, phasing and refinement statistics**

| Parameters                                | IRF9-IAD      | STAT2-IRF9                   |
|-------------------------------------------|---------------|------------------------------|
| <b>Data collection</b>                    |               |                              |
| Space group                               | $P3_221$      | $P2_1$                       |
| Cell dimensions                           |               |                              |
| <i>a</i> , <i>b</i> , <i>c</i> (Å)        | 76.77, 76.77, | 30.59, 123.96,               |
|                                           | 85.6          | 50.99 ( $\beta=92.1^\circ$ ) |
| Wavelength ( $\lambda$ )                  | 0.966         | 0.972                        |
| Resolution (Å)                            | 42.8–1.9      | 27.0–2.7                     |
| Total reflections                         | 66664         | 31975                        |
| Unique reflections                        | 22819         | 9943                         |
| $R_{\text{sym}}$ or $R_{\text{merge}}$    | 0.03 (0.94)*  | 0.33 (2.35)*                 |
| $I / \sigma I$                            | 14.5 (1.0) *  | 4.2 (1.0)*                   |
| Completeness (%)                          | 97.2 (82.2) * | 95.5 (75.8)*                 |
| Redundancy                                | 2.9 (2.1) *   | 3.2 (3.1)                    |
| Wilson <i>B</i> -factor (Å <sup>2</sup> ) | 42.7          | 52.34                        |
| <b>Refinement</b>                         |               |                              |
| $R_{\text{work}} / R_{\text{free}}$       | 20.6 /24.2    | 22.9/29.6                    |
| No. of atoms                              | 2970          | 2769                         |
| Protein                                   | 2933          | 2698                         |
| Ligand                                    | 5             | N/A                          |
| Solvent                                   | 32            | 71                           |
| <i>B</i> -factors (Å <sup>2</sup> )       |               |                              |
| Protein                                   | 70.3          | 54.6                         |
| Ligand                                    | 68.3          | N/A                          |
| Solvent                                   | 55.7          | 28.8                         |
| R.m.s deviations                          |               |                              |
| Bond lengths (Å)                          | 0.014         | 0.009                        |
| Bond angles (°)                           | 1.495         | 0.98                         |
| Ramachandran distribution                 |               |                              |
| Favoured                                  | 93.05         | 94.82                        |
| Allowed                                   | 6.95          | 5.18                         |
| Outliers                                  | 0.0           | 0.0                          |

590 To calculate  $R_{\text{free}}$ , 5% of the reflections were excluded from the refinement.  $R_{\text{sym}}$  is defined as  
591  $R_{\text{sym}} = \frac{\sum_{\text{hkl}} \sum_i |I_i(\text{hkl}) - \langle I(\text{hkl}) \rangle|}{\sum_{\text{hkl}} \sum_i I_i(\text{hkl})}$ . \*Values in parentheses are for the highest-resolution shell. N/A;  
592 not-applicable

593

594

595

596

597

598

599 **Table 2: Summary of ITC data**

600

| <b>STAT variant</b> | <b>IRF9 variant</b> | <b>Mutation(s)</b>                | <b>K<sub>d</sub> (nM) *</b> |
|---------------------|---------------------|-----------------------------------|-----------------------------|
| STAT2 WT            | IRF9 WT             | –                                 | 10 nM                       |
|                     | IF1-A               | R236E, F283A                      | n.b.                        |
| STAT2 WT            | IF1-B               | R236E, F283A, L274A               | n.b.                        |
|                     | IF1-C               | R236E, F283A, L274A, L233A        | n.b.                        |
| STAT2 WT            | IF2                 | R324E, D325K, Q331E, Q333E, P335S | 11 nM                       |
| STAT2 WT            | IF3                 | L326A, F330A, I376A               | 17 nM                       |
| STAT2 F174D         | IRF9 WT             | F174D                             | n.b.                        |
| STAT2 V171E         | IRF9 WT             | V171E                             | 2.5 μM                      |
| STAT1 WT            | IRF9 WT             | –                                 | 5 μM                        |
| STAT1 WT            | IF1-C               | R236E, F283A, L274A, L233A        | n.b.                        |
| STAT1 E169V         | IRF9 WT             | E169V                             | 116 nM                      |

\* n.b.: no binding

601 **Figures**

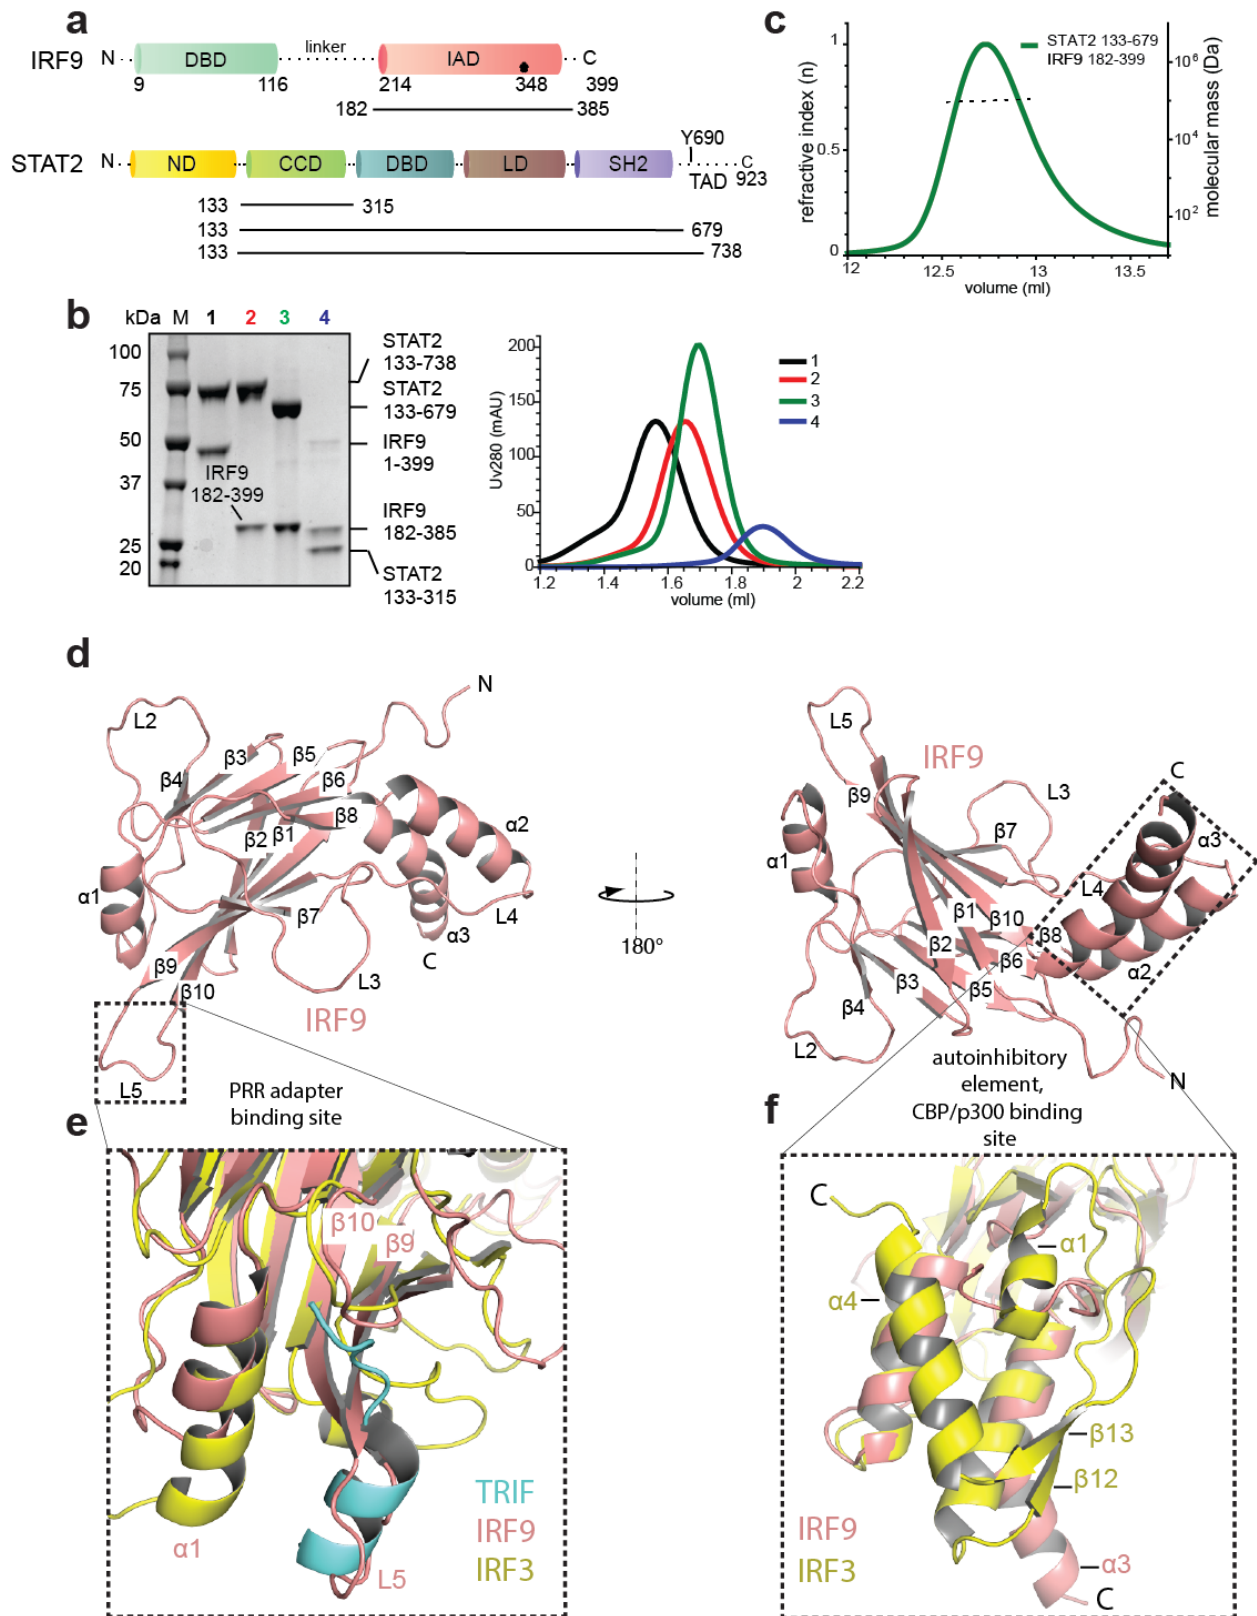

602

603 **Figure 1 Characterization of the STAT2–IRF9 complex and structure determination of the**  
604 **IRF9–IAD. a,** Domain organization of STAT2 and IRF9. DBD (DNA–binding domain), IAD  
605 (IRF–association domain), ND (N–domain), CCD (coiled–coil domain), LD (linker domain),  
606 SH2 (Src homology domain), TAD (transactivation domain). **b,** Size exclusion chromatography  
607 of different STAT2–IRF9 complexes. Fractions were analysed by SDS–PAGE. Bands  
608 corresponding to each protein are indicated. The analysed samples are 1: STAT2<sub>133–738</sub>–IRF9FL;  
609 2: STAT2<sub>133–738</sub>–IRF9<sub>182–399</sub>; 3: STAT2<sub>133–679</sub>–IRF9<sub>182–399</sub>; 4: STAT2<sub>133–315</sub>–IRF9<sub>182–385</sub>. **c,** Size  
610 exclusion chromatography and multi–angle laser light scattering profile of the STAT2<sub>133–679</sub>–  
611 IRF9–IAD complex. The black line represents the average molecular weight across the peak. **d,**  
612 Ribbon diagram representation of the IRF9–IAD structure (red). The secondary structure  
613 elements are labelled. The model is rotated 180° between the left and right panels. **e,** Left panel:  
614 Structural overlay of IRF9 (red) and IRF3 (yellow). The extended strands  $\beta$ 9 and  $\beta$ 10 of IRF9  
615 block access of the PRR adaptor TRIF (blue). **f,** Structural overlay of IRF9 and autoinhibited  
616 IRF3–IAD (yellow). The autoinhibitory element of IRF3 absent in IRF9  
617

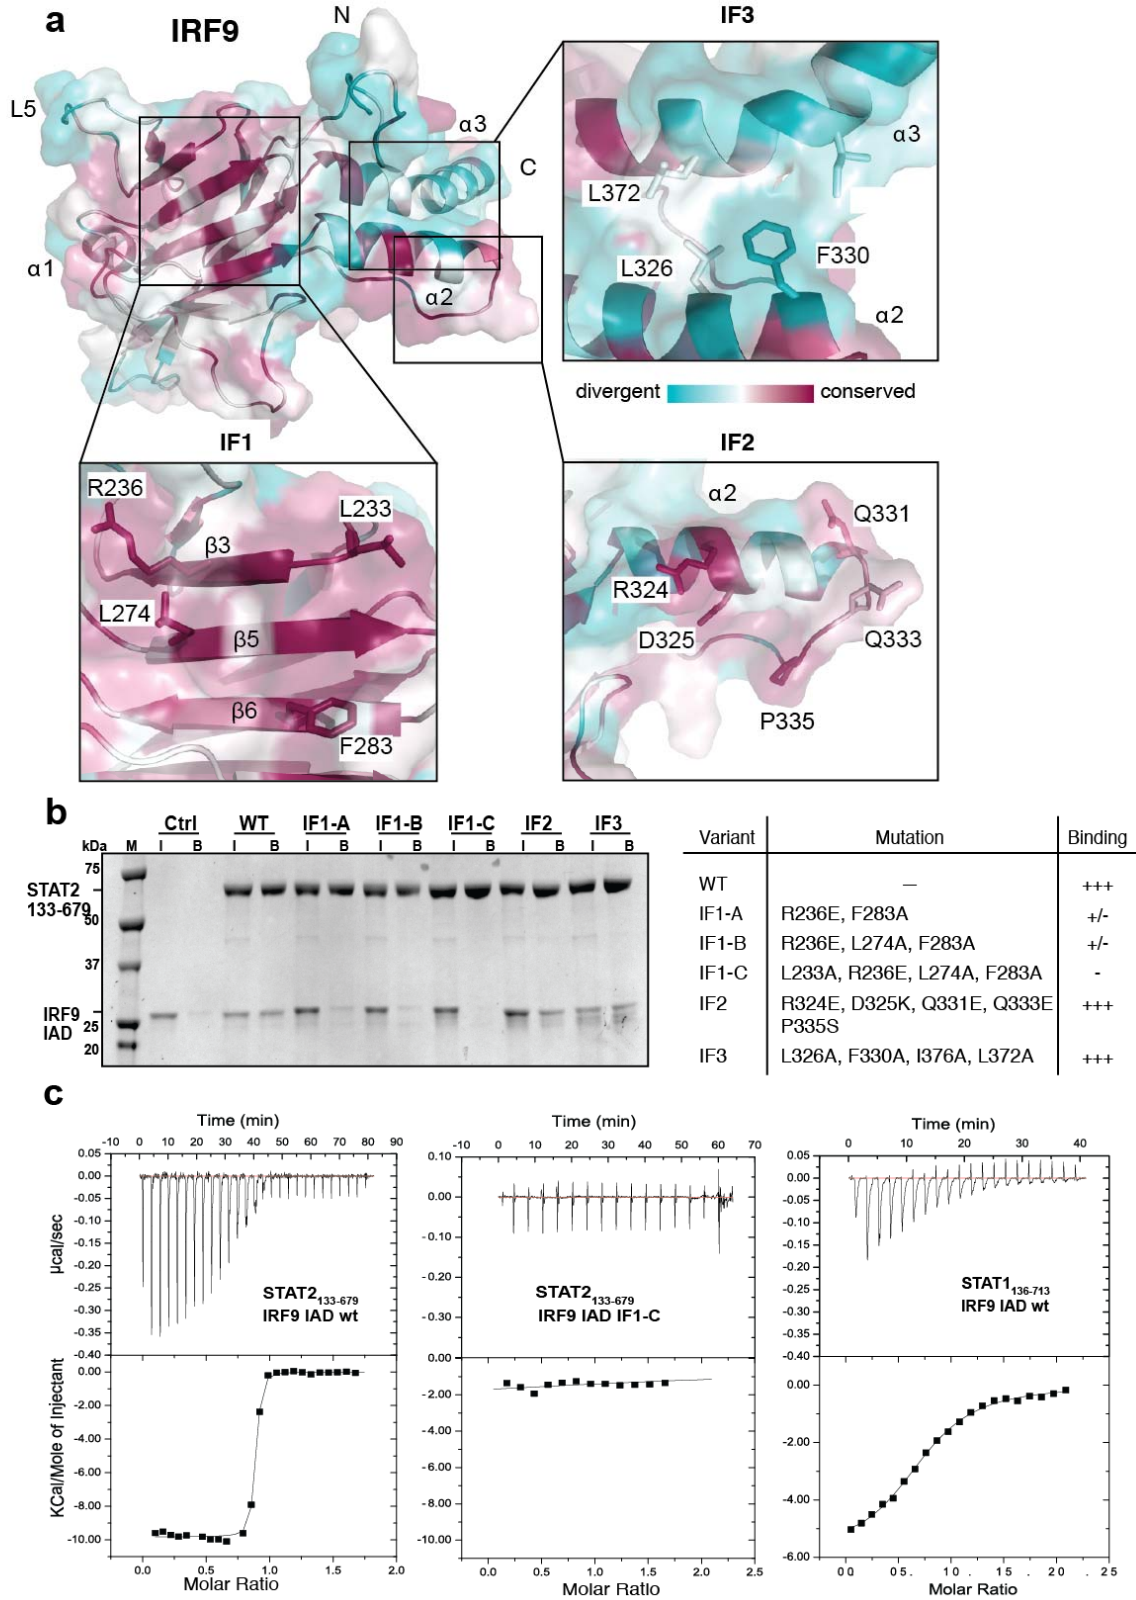

619 **Figure 2 Characterization of the STAT2 binding interface on IRF9. a**, The IRF9–IAD is  
620 coloured according to amino acid conservation among vertebrate IRF9 orthologs. Magenta =  
621 well conserved, light blue = highly variable; for sequence alignment, see Extended Data Fig. 2.  
622 Panels: zoom–in onto the conserved surfaces boxed in (a), showing the underlying amino acid  
623 residues that were analysed by mutagenesis. **b**, Purified His<sub>6</sub>–tagged STAT2<sub>133–679</sub> was incubated  
624 with IRF9–IAD variants containing point mutations in the different conserved surfaces. The  
625 resulting complexes were incubated with Ni<sup>2+</sup>–affinity resin, and bound proteins analysed by  
626 SDS–PAGE. Table: Summary of mutants analysed: Mutants in the IF1 interface reduced or  
627 abolished STAT2 binding. Mutation of residues in the IF2 or IF3 interface did not interfere with  
628 STAT2 binding. **c**, Isothermal titration calorimetry (ITC) binding curves for interaction between  
629 STAT2<sub>133–679</sub> and IRF9–IAD, STAT2<sub>133–679</sub> and IRF9–IAD IF1–C or STAT1<sub>136–713</sub> and IRF9–  
630 IAD.

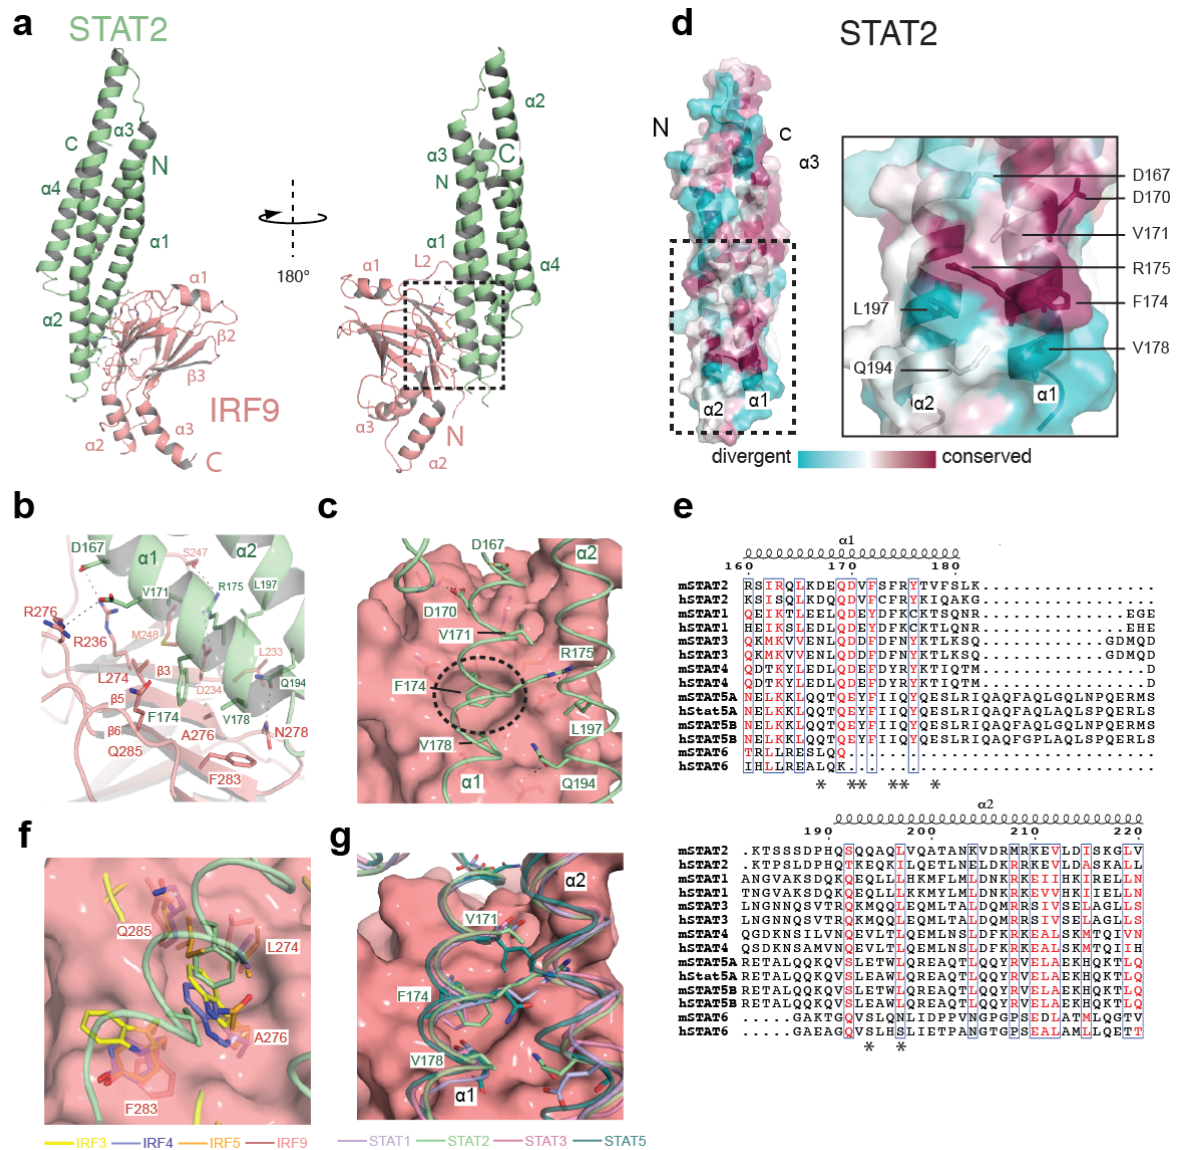

631  
 632 **Figure 3 Structure of the STAT2–IRF9 complex.** **a**, STAT2 (green) and IRF9 (red) are shown  
 633 as ribbons. The model is rotated 180° between the left and right panels. **b**, Expanded view of the  
 634 STAT2:IRF9 interface. Residues in the interface are shown with nitrogen in blue and oxygen in  
 635 red. Carbon atoms are coloured according to residue location. **c**, Surface drawing of IRF9 with  
 636 the recognition helices  $\alpha 1$  and  $\alpha 2$  of STAT2 shown as coils. Residues of STAT2 in the interface  
 637 are indicated and the key anchoring residue F174 is circled. **d**, The STAT2–CCD is coloured  
 638 according to amino acid conservation among vertebrate STAT2 orthologs. Magenta = well  
 639 conserved, light blue = highly variable. Panel: zoom–in onto the conserved surface patch  
 640 showing the underlying amino acid residues. **e**, Sequence alignment of mouse and human STAT  
 641 family members. Residues of STAT2 involved in IRF9 binding are indicated (\*). **f**, Surface

642 representation of IRF9 superposed with IRF3, 4 and 5. A276 of IRF9 which is critical for  
 643 accommodation of F174 of STAT2 is replaced by bulky side chains in in IRF3, 4 and 5. STAT2  
 644 is represented as coils. **g**, Structural overlay of STAT1, STAT3 and STAT5 onto STAT2. The  
 645 secondary anchoring residues V171 and V178 are replaced by charged or bulky residues in other  
 646 STATs.

647

648

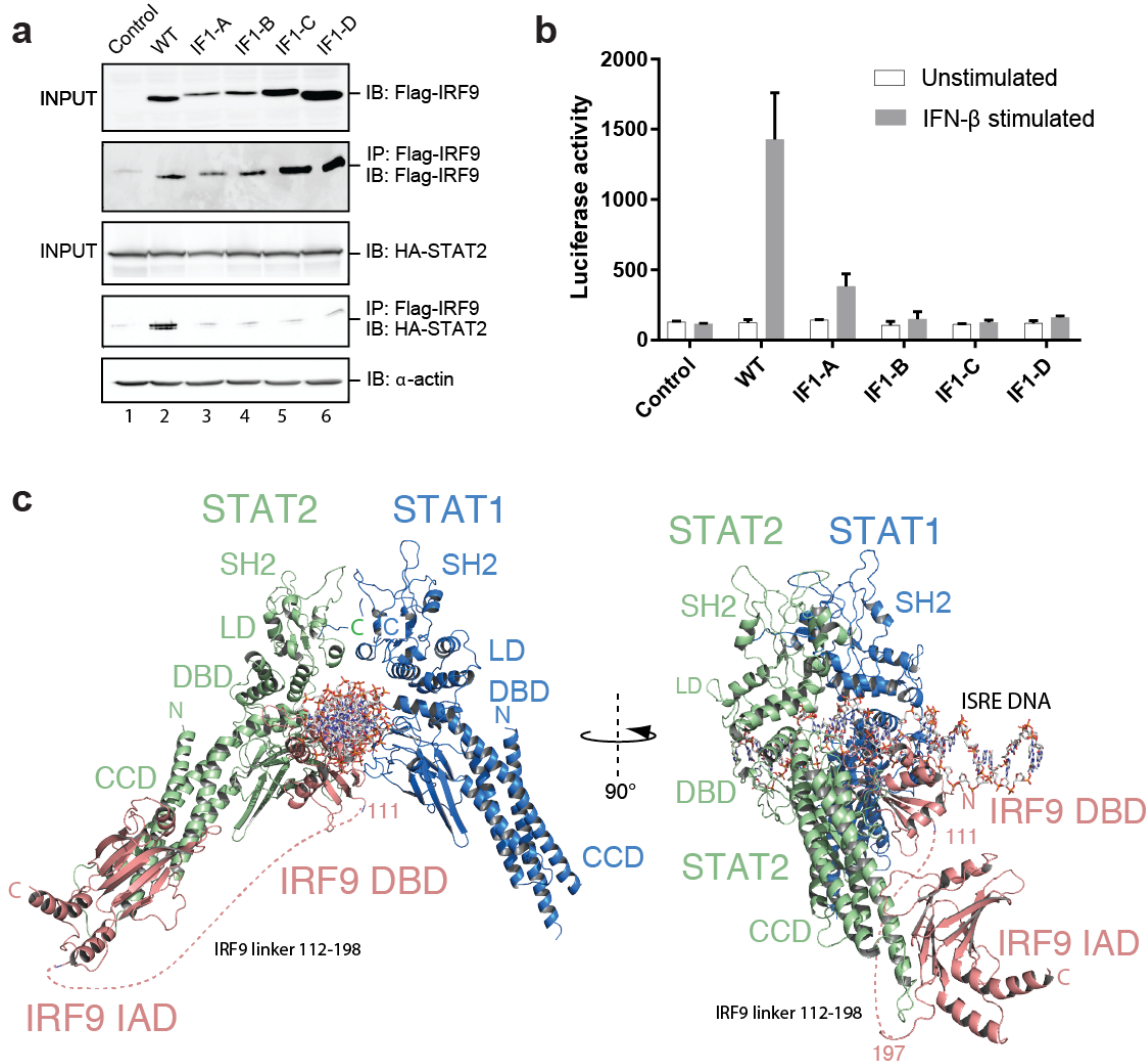

649

650 **Figure 4 Effects of point mutations in the STAT2–IRF9 interface on ISGF3 activity.** **a**, Co-  
 651 immunoprecipitation of IRF9 variants with STAT2: HEK293 cells were co-transfected with  
 652 FLAG-IRF9 WT or IF1 mutants and HA-STAT2. The empty FLAG vector was used as a  
 653 control. Immunoprecipitation (IP) was performed with anti-FLAG beads and immunoblotted (IB)



654 for FLAG\_IRF9 or HA-STAT2 . Actin concentration was used as a loading control for INPUT  
655 conditions. Two independent experiments were performed with consistency and one  
656 representative example is shown. **b**, MEF IRF9<sup>-/-</sup>/IRF-3<sup>-/-</sup> cells were co-transfected with the  
657 *IFIT1*prom- *Firefly* luciferase reporter and Renilla luciferase plasmids along with the indicated  
658 Flag-IRF9 expression plasmids. Cells were treated with 200U/mL IFN $\beta$  prior to assaying for  
659 luciferase activities expressed as *Firefly*/*Renilla* ratio. Three independent experiments were  
660 performed and the mean value  $\pm$  SEM are shown. **c**, Model of the ISGF3 complex bound to a  
661 ISRE DNA sequence 5'-GGGAAATGGAAACT-3. A STAT1 dimer bound to a GAS DNA  
662 sequence (1BG5) was positioned on the first 5'-GGAA-3' repeat. A homology model of the  
663 IRF9 DNA-binding domain (DBD) was positioned on the second GAAA repeat based on the  
664 structure of DNA-bound IRF3 (1T2K). The STAT2-IRF9 complex was overlaid with one copy  
665 of STAT1 of the STAT1 dimer to obtain the final model. A dashed line indicates the flexible  
666 amino acid linker spanning residues 112-198 between the IAD and DBD of IRF9. CCD, coiled-  
667 coil domain; LD, ligand binding domain; IAD, IRF association domain.  
668
